# Supplementary material for: Large-Scale Phenomics Identifies Primary and Fine-Tuning Roles for CRKs in Responses Related to Oxidative Stress
Source: PLoS Genet. 2015 Jul 21;11(7):e1005373. doi: 10.1371/journal.pgen.1005373 (PMC4511522; doi:10.1371/journal.pgen.1005373)
Supplement: S2 Table — (XLSX) [file pgen.1005373.s027.xlsx]

## Sheet: Sheet1
Experiment	Experimental readout	Clustering (all compared to Col-0 wild type)	Comments
Light stress	Electrolyte leakage	Red/blue: higher/lower electrolyte leakage	Electrolyte leakage is used as proxy measurement to infer cell death. Higher electrolyte leakage corresponds to more cell death
Ultraviolet A/B	Electrolyte leakage	Red/blue: higher/lower electrolyte leakage
flg22 treatment	ROS production, stomatal aperture measurement	Red/blue: more/less ROS produced and red/blue: bigger/smaller stomatal aperture	Pathogen-associated molecular pattern (PAMP) derived from flagellin, a bacterial protein
Chitin treatment	Stomatal aperture measurement	Red/blue: bigger/smaller stomatal aperture
Pseudomonas syringae pv. tomato DC3000 (Pto DC3000)	Bacterial growth curve/visual inspection	Red/blue: more/less disease	Hemibiotrophic bacterial pathogen
Golovinomyces orontii (Go)	Visual evaluation of disease symptoms	Red/blue: more/less disease	Virulent mildew, infectious on Arabidopsis
Blumeria graminis f.sp. hordei (Bgh)	Visual evaluation of disease symptoms	Red/blue: more/less disease	Non-host mildew, natural host barley
Ozone (O3)	Electrolyte leakage/Lesion formation (visual)	Red/blue: higher/lower electrolyte leakage
Xanthine + Xanthine Oxidase (X+XO)	Electrolyte leakage	Red/blue: higher/lower electrolyte leakage	Produces superoxide and hydrogen peroxide in the extracellular space
Methyl viologen (MV, paraquat)	Photosynthesis parameters	Red/blue: higher/lower photosynthetic efficiency	Superoxide production at photosystem I
3-(3,4-dichlorophenyl)-1,1-dimethylurea (DCMU)	Photosynthesis parameters	Red/blue: higher/lower photosynthetic efficiency	Oxididation of plastoquinone pool and inhibition of non-photochemical quenching (NPQ) capacity
NaCl	Germination rate	Red/blue: higher/lower percentage of seeds germinated
Water loss	Fresh weight of plants	Red/blue: higher/lower weight of rosettes
Flowering time	Days to first flower bud opening	Red/blue: longer/shorter time (days)
Bolting time	Days to appearance of flower buds	Red/blue: longer/shorter time (days)
Leaf epidermal segementation	Cell segmentation index	Red/blue: higher/lower cell number
Senescence	Days to first senescence symptoms (yellowing leaves)	Red/blue: longer/shorter time (days)
Endosperm rupture	Time in hours to penetration of radicle	Red/blue: higher/lower percentage of radicle penetration
Root length	Root length in mm 8 days after stratification	Red/blue: longer/shorter root
Stomatal number, length, aperture	Microscopy and measurements	Red/blue: larger/smaller stomatal aperture
Stomatal response to darkness, CO2 and O3	Whole-plant stomatal conductance	Red/blue: larger/smaller change in stomatal conductance due to stimulus
Abscisic acid (ABA) treatment	Stomatal aperture measurement	Red/blue: larger/smaller stomatal aperture
